# Supplementary material for: DNA Methylation Aberrations in Dimethylarsinic Acid-Induced Bladder Carcinogenesis
Source: MDPI journal article supplement (doi:10.3390/cancers15215274), 2023-11-03
Supplement: s1 [file s1]

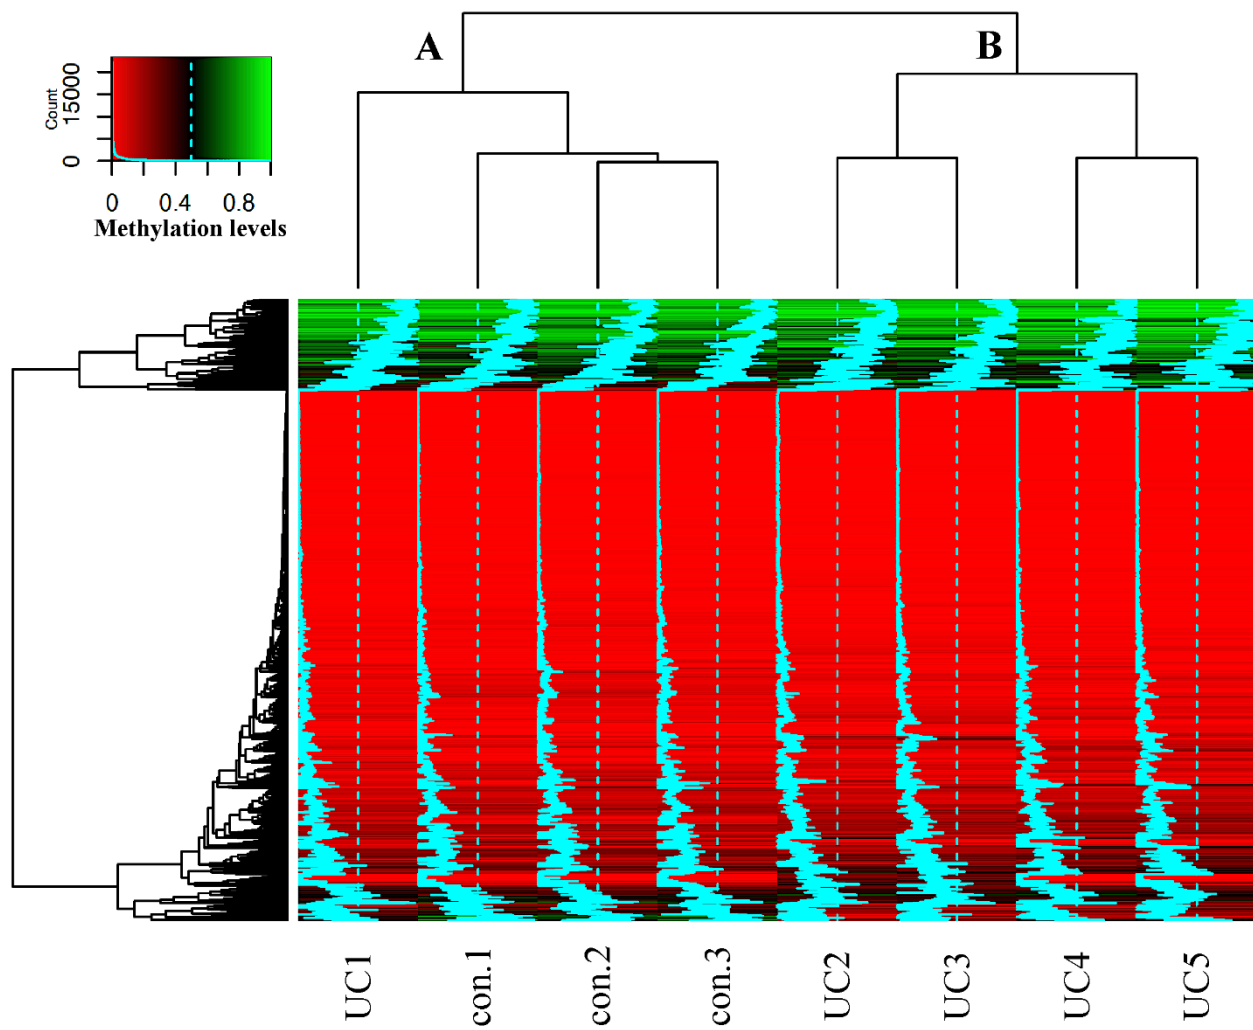

Supplementary Figure S1.

#### DNA methylation analysis of rat DMA<sup>V</sup>-induced UCs

A heat map of methylation profiles of UCs and normal bladder tissue of the control group (control) with a hierarchical clustering process. Bright red indicates 0% methylation, black indicates 50% methylation, and bright green indicates 100% methylation. The blue line corresponds to the methylation levels of the respective regions, and the dotted line represents 50% methylation.

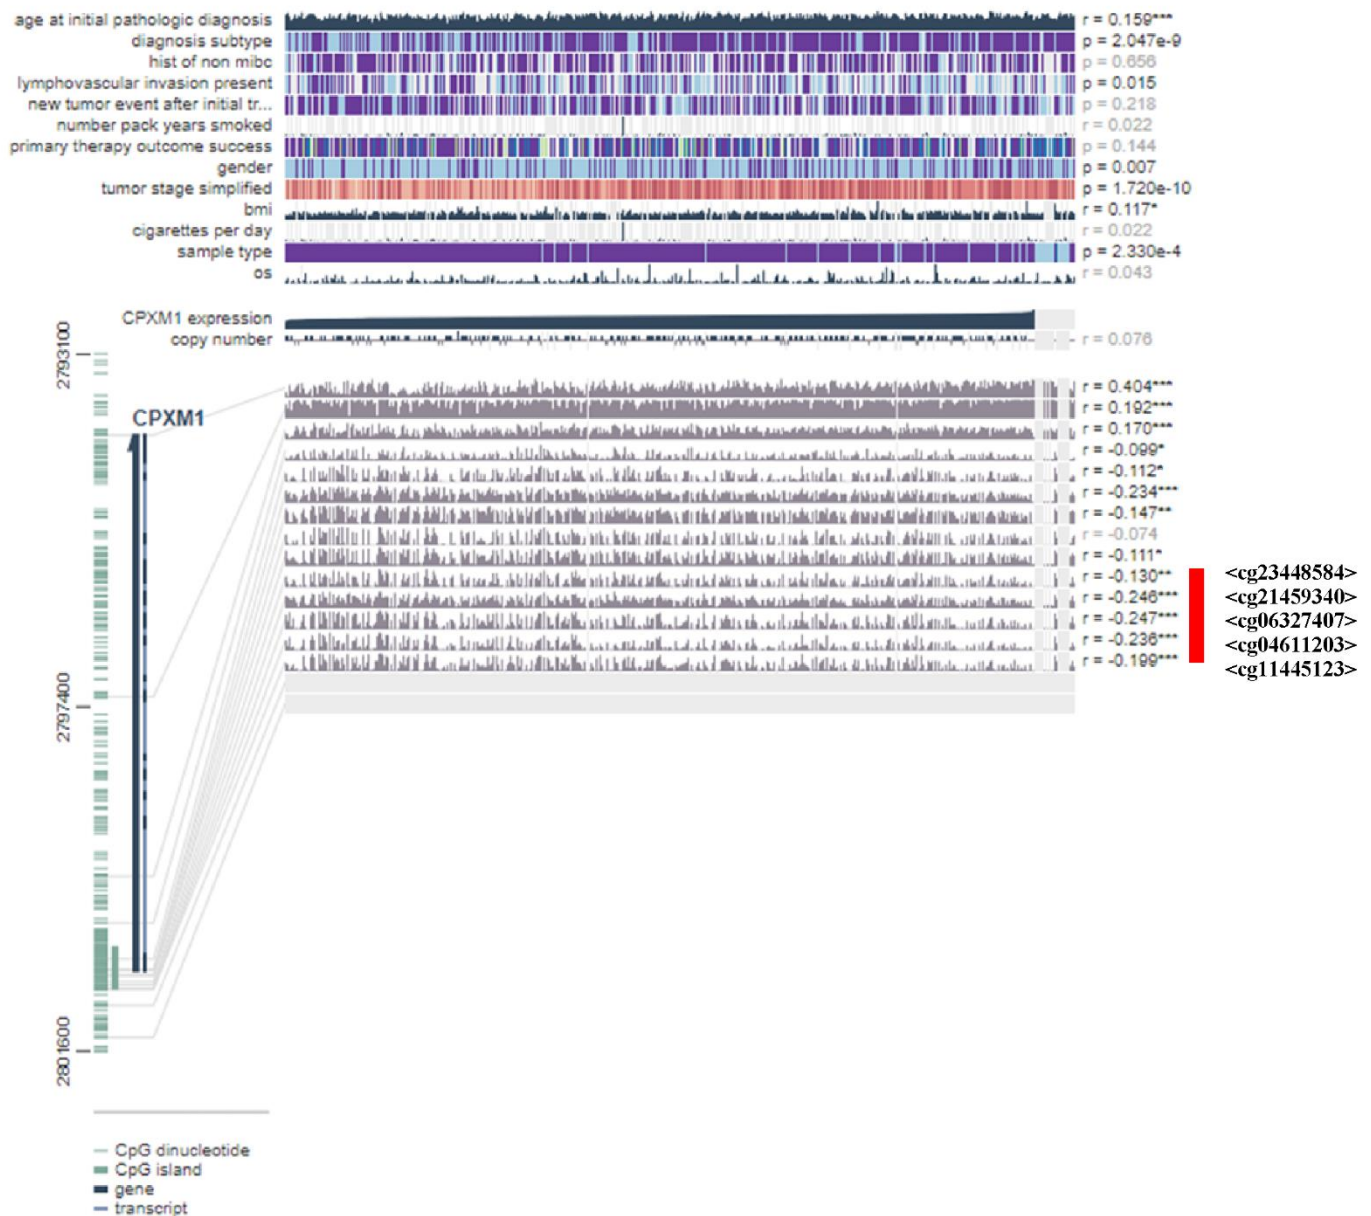

Supplementary Figure S2.

The correlation between mRNA *CPXM1* expression and its DNA methylation was analysed using MEXPRESS in 450 human bladder UCs. The red bar indicates the regions that mRNA expression of *CPXM1* and its DNA methylation level in the promoter region are negatively correlated. (\* p < 0.05, \*\* p < 0.01, \*\*\* p < 0.001)
