# Supplementary material for: DNA Methylation Aberrations in Dimethylarsinic Acid-Induced Bladder Carcinogenesis
Source: Cancers (Basel). 2023 Nov 3;15(21):5274. doi: 10.3390/cancers15215274 (PMC10648661; doi:10.3390/cancers15215274)
Supplement: Supplementary file 1 [file cancers-15-05274-s001.zip › Supplementary Table S1 .xlsx]

## Sheet: hyper 01
Supplementary Table S1. 246 genes hypermethylated in DMAV-induced UCs.
chr	Start	End	Methylation levels		Differences of Methylation levels	Distance to TSS	Gene Name	RefSeq ID	Gene Description
			Control	DMAV-UC
chr7	143956956	143957032	0.0819	0.7395	0.6576	-326	Aaas	NM_001106795	aladin WD repeat nucleoporin
chr2	20857468	20857533	0.062	0.1843	0.1223	73	Acot12	NM_130747	acyl-CoA thioesterase 12
chr12	22210968	22211060	0.0341	0.4474	0.4133	66	Actl6b	NM_001105917	actin-like 6B
chr4	85662585	85662707	0.0221	0.1229	0.1008	-246	Adcyap1r1	NM_133511	ADCYAP receptor type 1
chr3	124145571	124145638	0.0173	0.2301	0.2128	-39	Adra1d	NM_024483	adrenoceptor alpha 1D
chr5	61382347	61382390	0.0215	0.4803	0.4588	18	Aldh1b1	NM_001011975	aldehyde dehydrogenase 1 family, member B1
chr5	12925651	12925831	0.0391	0.1785	0.1394	-170	Alkal1	NM_001302143	ALK and LTK ligand 1
chr7	34406089	34406331	0.0308	0.3636	0.3328	72	Amdhd1	NM_001191781	amidohydrolase domain containing 1
chr1	217902437	217902463	0.0263	0.2639	0.2376	23	Ano1	NM_001107564	anoctamin 1
chr7	141249013	141249133	0.0616	0.2577	0.1961	23	Aqp5	NM_012779	aquaporin 5
chr7	70476394	70476428	0.0301	0.2348	0.2047	-71	Arhgef25	NM_199395	Rho guanine nucleotide exchange factor 25
chr1	167202739	167202831	0.2892	0.443	0.1538	-18	Art5	NM_001013039	ADP-ribosyltransferase 5
chr10	68517484	68517513	0.0183	0.3013	0.283	80	Asic2	NM_012892	acid sensing ion channel subunit 2
chr15	36565779	36566026	0.0523	0.1529	0.1006	-128	Atp12a	NM_001301664	ATPase H+/K+ transporting non-gastric alpha2 subunit
chr10	59529190	59529393	0.3185	0.8229	0.5044	-493	Atp2a3	NM_012914	ATPase sarcoplasmic/endoplasmic reticulum Ca2+ transporting 3
chr9	29984151	29984190	0.0183	0.3	0.2817	94	B3gat2	NM_022609	beta-1,3-glucuronyltransferase 2
chr6	132958488	132958521	0.0016	0.1705	0.1689	41	Begain	NM_001111115	brain-enriched guanylate kinase-associated
chr3	137969808	137970033	0.1227	0.318	0.1953	-263	Bfsp1	NM_031555	beaded filament structural protein 1
chr3	176282443	176282539	0.0134	0.1912	0.1778	-280	Bhlhe23	NM_001109211	basic helix-loop-helix family, member e23
chr2	23289166	23289230	0.228	0.4411	0.2131	68	Bhmt2	NM_001014256	betaine-homocysteine S-methyltransferase 2
chr13	76049264	76049413	0.0051	0.1396	0.1345	24	Brinp2	NM_173115	BMP/retinoic acid inducible neural specific 2
chr13	36378005	36378051	0.0234	0.2167	0.1933	-159	C1ql2	NM_001105949	complement C1q like 2
chr3	1925148	1925209	0.0301	0.3551	0.325	-270	Cacna1b	NM_147141	calcium voltage-gated channel subunit alpha1 B
chr4	16130573	16130594	0.0597	0.4414	0.3817	-9	Cacna2d1	NM_001110847	calcium voltage-gated channel auxiliary subunit alpha2delta 1
chr10	85974933	85975072	0.0155	0.1346	0.1191	-359	Cacnb1	NM_017346	calcium voltage-gated channel auxiliary subunit beta 1
chr7	119352414	119352589	0.0712	0.3172	0.246	-469	Cacng2	NM_053351	calcium voltage-gated channel auxiliary subunit gamma 2
chr11	67188580	67188629	0.0164	0.3666	0.3502	-25	Casr	NM_016996	calcium-sensing receptor
chr19	20607325	20607382	0.0129	0.2684	0.2555	-153	Cbln1	NM_001109127	cerebellin 1 precursor
chr3	170041003	170041242	0	0.2333	0.2333	-170	Cbln4	NM_001109210	cerebellin 4 precursor
chr7	13913977	13914023	0.0743	0.4459	0.3716	71	Ccdc105	NM_001025774	coiled-coil domain containing 105
chr13	101163163	101163288	0.8311	0.9345	0.1034	91	Ccdc185	NM_001170428	coiled-coil domain containing 185
chr5	50193516	50193624	0.0195	0.2228	0.2033	-41	Cfap206	NM_001079701	cilia and flagella associated protein 206
chr1	124039199	124039228	0.0143	0.1802	0.1659	-21	Chrna7	NM_012832	cholinergic receptor nicotinic alpha 7 subunit
chr11	77814965	77815145	0.0189	0.1402	0.1213	-161	Cldn1	NM_031699	claudin 1
chr8	44846688	44846762	0.0205	0.2303	0.2098	-432	Clmp	NM_173154	CXADR-like membrane protein
chr1	25172837	25173105	0.038	0.1719	0.1339	-118	Clvs2	NM_001108459	clavesin 2
chr7	139483929	139483989	0.0242	0.1532	0.129	38	Col2a1	NM_012929	collagen type II alpha 1 chain
chr1	198129083	198129171	0.0264	0.1797	0.1533	-270	Coro1a	NM_130411	coronin 1A
chr4	145238855	145238989	0.0366	0.2588	0.2222	-25	Cpne9	NM_001024982	copine family member 9
chr3	122920524	122920747	0.0308	0.3883	0.3575	48	Cpxm1	NM_001106511	carboxypeptidase X (M14 family), member 1
chr1	189959909	189960058	0.0259	0.163	0.1371	82	Crym	NM_053955	crystallin, mu
chr4	109042779	109042875	0.0367	0.2072	0.1705	-164	Ctnna2	NM_001106598	catenin alpha 2
chr3	172537897	172537973	0.0331	0.1722	0.1391	-58	Ctsz	NM_183330	cathepsin Z
chr2	102871141	102871335	0.039	0.2467	0.2077	19	Cyp7b1	NM_019138	cytochrome P450 family 7 subfamily B member 1
chr6	47811922	47812079	0.6121	0.8706	0.2585	-148	Dcdc2c	NM_001195807	doublecortin domain containing 2C
chr13	105408236	105408254	0.3333	0.8478	0.5145	66	Ddx3y	NM_001108858	DEAD-box helicase 3, Y-linked
chr9	82556597	82556718	0.0182	0.1361	0.1179	76	Des	NM_022531	desmin
chr16	80597261	80597334	0.0204	0.1582	0.1378	-327	Dlgap2	NM_053901	DLG associated protein 2
chr2	23289390	23289464	0.0948	0.2317	0.1369	36	Dmgdh	NM_139102	dimethylglycine dehydrogenase
chr1	243662889	243662954	0.0395	0.2626	0.2231	99	Dmrt2	NM_001107597	doublesex and mab-3 related transcription factor 2
chr13	80379880	80379916	0.0132	0.1383	0.1251	31	Dnm3	NM_138538	dynamin 3
chr3	168345308	168345417	0.0088	0.1612	0.1524	67	Dok5	NM_001109344	docking protein 5
chr1	211422967	211423076	0.0176	0.264	0.2464	0	Dpysl4	NM_012933	dihydropyrimidinase-like 4
chr8	53678691	53678771	0.0238	0.2312	0.2074	-46	Drd2	NM_012547	dopamine receptor D2
chr14	77221971	77222098	0.0281	0.186	0.1579	-29	Drd5	NM_012768	dopamine receptor D5
chr6	136003007	136003138	0.008	0.1119	0.1039	15	Eif5	NM_001329879	eukaryotic translation initiation factor 5
chr8	58543071	58543192	0.0323	0.1577	0.1254	-288	Elmod1	NM_001191579	ELMO domain containing 1
chr17	21382409	21382506	0.0357	0.1763	0.1406	-3	Elovl2	NM_001109118	ELOVL fatty acid elongase 2
chr14	3390183	3390323	0.0186	0.1401	0.1215	-310	Ephx4	NM_001105994	epoxide hydrolase 4
chr1	157920767	157920843	0.009	0.2073	0.1983	19	Fam181b	NM_001109150	family with sequence similarity 181, member B
chr2	79440118	79440157	0.0063	0.1093	0.103	-151	Fbxl7	NM_001108545	F-box and leucine-rich repeat protein 7
chr19	26173461	26173765	0.0351	0.2807	0.2456	-158	Fbxw9	NM_001081634	F-box and WD repeat domain containing 9
chr15	12827199	12827232	0.0119	0.1688	0.1569	-491	Fezf2	NM_001107251	Fez family zinc finger 2
chr1	237065764	237065905	0.0319	0.1518	0.1199	82	Foxb2	NM_001168584	forkhead box B2
chr5	133725632	133725695	0.0411	0.1845	0.1434	-8	Foxe3	NM_134339	forkhead box E3
chr6	69971203	69971236	0.0217	0.3151	0.2934	-7	Foxg1	NM_012560	forkhead box G1
chr7	119185294	119185366	0.0585	0.4069	0.3484	-93	Foxred2	NM_001191787	FAD-dependent oxidoreductase domain containing 2
chr11	65845672	65845738	0.0171	0.4458	0.4287	-330	Fstl1	NM_024369	follistatin-like 1
chr2	174542741	174542782	0.0188	0.1647	0.1459	95	Fstl5	NM_001271195	follistatin-like 5
chr18	402077	402193	0.1046	0.5078	0.4032	-160	Fundc2	NM_001135757	FUN14 domain containing 2
chr1	112947093	112947135	0.0056	0.1696	0.164	-383	Gabra5	NM_017295	gamma-aminobutyric acid type A receptor alpha 5 subunit
chr1	113034303	113034340	0.027	0.2661	0.2391	56	Gabrb3	NM_017065	gamma-aminobutyric acid type A receptor beta 3 subunit
chrX	152852415	152852591	0.0074	0.214	0.2066	-3	Gabrq	NM_031733	gamma-aminobutyric acid type A receptor theta subunit
chr17	89171434	89171586	0.0143	0.1856	0.1713	-66	Gad2	NM_012563	glutamate decarboxylase 2
chr12	28382019	28382109	0.0327	0.2307	0.198	-267	Galnt17	NM_001025112	polypeptide N-acetylgalactosaminyltransferase 17
chr12	52187224	52187388	0.0082	0.1612	0.153	-142	Galnt9	NM_001122644	polypeptide N-acetylgalactosaminyltransferase 9
chr18	79258504	79258529	0	0.2638	0.2638	50	Galr1	NM_012958	galanin receptor 1
chr9	97066206	97066381	0.0118	0.1215	0.1097	-439	Gbx2	NM_053708	gastrulation brain homeobox 2
chr10	109707538	109707652	0.0608	0.2348	0.174	-367	Gcgr	NM_172092	glucagon receptor
chr3	159823733	159823965	0	0.2264	0.2264	-29	Gdap1l1	NM_001107798	ganglioside-induced differentiation-associated protein 1-like 1
chr3	105470431	105470627	0.0193	0.2107	0.1914	-54	Gjd2	NM_019281	gap junction protein, delta 2
chr11	86520944	86521188	0.3028	0.8943	0.5915	74	Gp1bb	NM_053930	glycoprotein Ib platelet beta subunit
chr12	19599569	19599703	0.0688	0.241	0.1722	-262	Gpc2	NM_138511	glypican 2
chr12	10255003	10255030	0.0117	0.1357	0.124	66	Gpr12	NM_001037295	G protein-coupled receptor 12
chr1	203970915	203970950	0.0578	0.3402	0.2824	-219	Gpr26	NM_138841	G protein-coupled receptor 26
chr20	45815908	45816021	0.0117	0.2413	0.2296	-25	Gpr6	NM_031806	G protein-coupled receptor 6
chr5	128009455	128009720	0.0252	0.167	0.1418	22	Gpx7	NM_001106673	glutathione peroxidase 7
chr2	179704755	179704909	0.0204	0.2287	0.2083	-203	Gria2	NM_017261	glutamate ionotropic receptor AMPA type subunit 2
chr3	2534654	2534808	0.0276	0.1608	0.1332	-68	Grin1	NM_001270608	glutamate ionotropic receptor NMDA type subunit 1
chr12	9607106	9607173	0.0202	0.1668	0.1466	28	Gsx1	NM_001191663	GS homeobox 1
chr8	407988	408064	0.0297	0.245	0.2153	25	Gucy1a2	NM_023956	guanylate cyclase 1 soluble subunit alpha 2
chr20	31402631	31402682	0.0297	0.2967	0.267	-174	H2afy2	NM_001135807	H2A histone family, member Y2
chr2	50099611	50099716	0.0132	0.214	0.2008	88	Hcn1	NM_053375	hyperpolarization-activated cyclic nucleotide-gated potassium channel 1
chr14	80544748	80544791	0.0211	0.1946	0.1735	-425	Hmx1	NM_001108363	H6 family homeobox 1
chr7	144577508	144577632	0.0322	0.3224	0.2902	-8	Hoxc10	NM_001308636	homeo box C10
chr7	144547921	144548047	0.0344	0.2715	0.2371	45	Hoxc12	NM_001106796	homeo box C12
chr10	50927908	50928000	0.0147	0.1881	0.1734	-355	Hs3st3a1	NM_001172067	heparan sulfate-glucosamine 3-sulfotransferase 3A1
chr1	215838399	215838480	0.191	0.4405	0.2495	-231	Igf2	NM_001190163	insulin-like growth factor 2
chr1	33910730	33910746	0.1	0.4135	0.3135	-174	Irx1	NM_001107331	iroquois homeobox 1
chr2	48501394	48501601	0.006	0.2259	0.2199	-281	Isl1	NM_017339	ISL LIM homeobox 1
chr3	66192969	66193096	0.01	0.1531	0.1431	56	Itga4	NM_001107737	integrin subunit alpha 4
chr8	28208311	28208435	0.0056	0.1269	0.1213	93	Jam3	NM_001004269	junctional adhesion molecule 3
chr5	161035900	161035966	0.0267	0.1642	0.1375	-394	Kazn	NM_001014070	kazrin, periplakin interacting protein
chr3	163935525	163935613	0.173	0.4745	0.3015	41	Kcnb1	NM_013186	potassium voltage-gated channel subfamily B member 1
chr2	207923736	207923817	0.018	0.1708	0.1528	2	Kcnd3	NM_001270962	potassium voltage-gated channel subfamily D member 3
chrX	113584292	113584502	0.0792	0.3915	0.3123	62	Kcne5	NM_001101003	potassium voltage-gated channel subfamily E regulatory subunit 5
chr1	102106450	102106662	0.0302	0.4123	0.3821	-429	Kcnj11	NM_031358	potassium voltage-gated channel subfamily J member 11
chr7	113937577	113937752	0.0236	0.3462	0.3226	-10	Kcnk9	NM_053405	potassium two pore domain channel subfamily K member 9
chr9	28141079	28141111	0.0069	0.2564	0.2495	19	Kcnq5	NM_001134643	potassium voltage-gated channel subfamily Q member 5
chr7	110031305	110031400	0.0159	0.1607	0.1448	-465	Khdrbs3	NM_022249	KH RNA binding domain containing, signal transduction associated 3
chr7	143085752	143085957	0.1609	0.4516	0.2907	-22	Krt83	NM_001101675	keratin 83
chr14	60764065	60764137	0.0141	0.2366	0.2225	-224	Lgi2	NM_001107219	leucine-rich repeat LGI family, member 2
chr4	145147352	145147415	0.0199	0.2255	0.2056	13	Lhfpl4	NM_181387	LHFPL tetraspan subfamily member 4
chr20	5815756	5815847	0.0163	0.1381	0.1218	-35	Lhfpl5	NM_001013906	LHFPL tetraspan subfamily member 5
chr12	41671436	41671545	0.0079	0.1103	0.1024	-54	Lhx5	NM_139036	LIM homeobox 5
chr2	260596872	260596917	0.0287	0.3343	0.3056	-118	Lhx8	NM_001012219	LIM homeobox 8
chr6	144384582	144384719	0.0244	0.2436	0.2192	-36	LOC102548847	NR_110712	uncharacterized LOC102548847
chr10	57239475	57239603	0.0695	0.6232	0.5537	-454	LOC687707	NM_001145538	hypothetical protein LOC687707
chr10	57670969	57671107	0.0134	0.133	0.1196	42	LOC691995	NM_001103353	hypothetical protein LOC691995
chr7	117786958	117786995	0.0484	0.2318	0.1834	-105	Lrrc24	NM_001135896	leucine rich repeat containing 24
chr4	108301158	108301195	0.013	0.1185	0.1055	48	LRRTM1	NM_001109374	leucine rich repeat transmembrane neuronal 1
chr19	58505808	58505956	0.0069	0.2005	0.1936	71	Map10	NM_001277391	microtubule-associated protein 10
chr6	89292302	89292337	0.0183	0.1915	0.1732	-293	Mdga2	NM_199269	MAM domain containing glycosylphosphatidylinositol anchor 2
chr3	80842896	80842964	0.2248	0.7768	0.552	-301	Mdk	NM_030859	midkine
chr7	123307874	123307993	0.164	0.4431	0.2791	-107	Mei1	NM_001130555	meiotic double-stranded break formation protein 1
chr5	159534256	159534301	0.1282	0.5113	0.3831	77	Mfap2	NM_001107989	microfibril associated protein 2
chr3	8407954	8408004	0.5186	0.861	0.3424	-454	Mir219-2	NR_031933	microRNA 219-2
chr3	8407293	8407361	0.3111	0.8026	0.4915	-100	Mir2964	NR_037382	microRNA 2964
chr1	64330690	64330894	0.0311	0.2004	0.1693	-153	Mir935	NR_032758	microRNA 935
chr5	173081586	173081672	0.0905	0.8023	0.7118	-189	Mmp23	NM_053606	matrix metallopeptidase 23
chr7	124682897	124682934	0.71	0.9042	0.1942	48	Mpped1	NM_001130569	metallophosphoesterase domain containing 1
chr7	119626560	119626825	0.5562	0.8919	0.3357	58	Mpst	NM_138843	mercaptopyruvate sulfurtransferase
chr2	260108824	260108841	0.2423	0.564	0.3217	64	Msh4	NM_001106477	mutS homolog 4
chr15	110075508	110075540	0.0574	0.2707	0.2133	99	Nalcn	NM_153630	sodium leak channel, non-selective
chr15	44860610	44860649	0.0102	0.1857	0.1755	-35	Nefm	NM_017029	neurofilament medium
chr1	105348789	105348965	0.0064	0.1364	0.13	-192	Nell1	NM_031069	neural EGFL like 1
chr3	66417895	66417942	0.0103	0.1479	0.1376	-302	Neurod1	NM_019218	neuronal differentiation 1
chr13	49522519	49522669	0.0115	0.1128	0.1013	-179	Nfasc	NM_001160314	neurofascin
chr17	45175220	45175395	0.1614	0.2988	0.1374	54	Nkapl	NM_001029913	NFKB activating protein-like
chr1	263366687	263366852	0.0324	0.349	0.3166	-496	Nkx2-3	NM_001107594	NK2 homeobox 3
chr14	9554850	9554974	0.0294	0.1398	0.1104	-352	Nkx6-1	NM_031737	NK6 homeobox 1
chr13	70379127	70379302	0.1264	0.3883	0.2619	-131	Nmnat2	NM_001048042	nicotinamide nucleotide adenylyltransferase 2
chr1	150797186	150797243	0.0359	0.1564	0.1205	13	Nox4	NM_053524	NADPH oxidase 4
chr1	220265801	220265825	0.0943	0.6353	0.541	-41	Npas4	NM_153626	neuronal PAS domain protein 4
chr10	109786228	109786345	0.0886	0.5556	0.467	65	Npb	NM_153293	neuropeptide B
chr5	13379630	13379791	0.029	0.1384	0.1094	-61	Npbwr1	NM_001014784	neuropeptides B and W receptor 1
chr13	73929091	73929282	0.0239	0.1784	0.1545	51	Nphs2	NM_130828	NPHS2, podocin
chr5	59128523	59128560	0.0132	0.1417	0.1285	-361	Npr2	NM_053838	natriuretic peptide receptor 2
chr12	12025701	12025812	0.021	0.3362	0.3152	-210	Nptx2	NM_001034199	neuronal pentraxin 2
chr20	47306303	47306329	0.0571	0.4344	0.3773	2	Nr2e1	NM_001113197	nuclear receptor subfamily 2, group E, member 1
chr1	131455080	131455128	0.0778	0.1931	0.1153	-415	Nr2f2	NM_080778	nuclear receptor subfamily 2, group F, member 2
chr8	118893676	118893725	0.103	0.7197	0.6167	-140	Nradd	NM_139259	neurotrophin receptor associated death domain
chr4	158704121	158704222	0.0109	0.1187	0.1078	-2	Ntf3	NM_001270868	neurotrophin 3
chr8	30479765	30479799	0.0045	0.1192	0.1147	-369	Ntm	NM_017354	neurotrimin
chr4	34959208	34959290	0.0147	0.1219	0.1072	-472	Nxph1	NM_012994	neurexophilin 1
chr8	29452811	29452971	0.0167	0.1186	0.1019	-287	Opcml	NM_053848	opioid binding protein/cell adhesion molecule-like
chr5	141018289	141018506	0.0242	0.6296	0.6054	-100	Oxct2a	NM_001012221	3-oxoacid CoA transferase 2A
chr12	14112388	14112443	0.2068	0.5487	0.3419	-10	Papolb	NM_001012020	poly(A) polymerase beta
chr1	264504358	264504440	0.0203	0.1299	0.1096	-192	Pax2	NM_001106361	paired box 2
chr9	84101246	84101406	0.0368	0.2075	0.1707	-154	Pax3	NM_053710	paired box 3
chr5	158313439	158313577	0.0345	0.1864	0.1519	-82	Pax7	NM_001191984	paired box 7
chr20	12429119	12429169	0.0199	0.3196	0.2997	-166	Pcbp3	NM_001011945	poly(rC) binding protein 3
chrX	92596399	92596507	0.007	0.2534	0.2464	92	Pcdh11x	NM_001271228	protocadherin 11 X-linked
chr18	30114669	30114802	0.0444	0.3742	0.3298	28	Pcdhac1	NM_199509	protocadherin alpha subfamily C, 1
chr18	30172574	30172662	0.0097	0.1707	0.161	-122	Pcdhac2	NM_201422	protocadherin alpha subfamily C, 2
chr4	17059197	17059254	0.0491	0.2713	0.2222	-305	Pclo	NM_020098	piccolo (presynaptic cytomatrix protein)
chr10	77511807	77511858	0.0127	0.3133	0.3006	48	Pctp	NM_017225	phosphatidylcholine transfer protein
chr2	40655391	40655423	0	0.1304	0.1304	8	Pde4d	NM_001113328	phosphodiesterase 4D
chr1	143035726	143035824	0.0139	0.2741	0.2602	-443	Pde8a	NM_198767	phosphodiesterase 8A
chr1	123100441	123100486	0.0297	0.1645	0.1348	0	Peg12	NM_001170562	paternally expressed 12
chr2	119538089	119538119	0.0298	0.2565	0.2267	-405	Pex5l	NM_173152	peroxisomal biogenesis factor 5-like
chr1	166893746	166893826	0.0492	0.2121	0.1629	52	Phox2a	NM_053869	paired-like homeobox 2a
chrX	111389027	111389094	0.0456	0.5258	0.4802	-496	Pih1d3	NM_001024890	PIH1 domain containing 3
chr2	233615187	233615440	0.0156	0.2627	0.2471	-376	Pitx2	NM_001042505	paired-like homeodomain 2
chr12	31629986	31630087	0.6344	0.8094	0.175	-156	Piwil1	NM_001108853	piwi-like RNA-mediated gene silencing 1
chr13	94355525	94355608	0.0066	0.1299	0.1233	-348	Pld5	NM_001191674	phospholipase D family, member 5
chr8	99977331	99977438	0.0165	0.2713	0.2548	51	Plod2	NM_175869	procollagen lysine, 2-oxoglutarate 5-dioxygenase 2
chr1	141187740	141187802	0.2497	0.4073	0.1576	62	Polg	NM_053528	DNA polymerase gamma, catalytic subunit
chr1	192233763	192233795	0.0168	0.3795	0.3627	-1	Prkcb	NM_012713	protein kinase C, beta
chr4	160334610	160334672	0.0749	0.2799	0.205	6	Prmt8	NM_001271385	protein arginine methyltransferase 8
chr3	9681594	9681828	0.0992	0.3117	0.2125	-160	Prrx2	NM_001105739	paired related homeobox 2
chr9	115555234	115555258	0.002	0.1108	0.1088	15	Ptprm	NM_001168632	protein tyrosine phosphatase, receptor type, M
chr9	82461684	82461719	0.024	0.1335	0.1095	39	Ptprn	NM_053881	protein tyrosine phosphatase, receptor type, N
chr6	144384768	144384872	0.0166	0.4658	0.4492	47	Ptprn2	NM_031600	protein tyrosine phosphatase, receptor type N2
chr4	171251153	171251202	0.0113	0.1345	0.1232	-65	Ptpro	NM_017336	protein tyrosine phosphatase, receptor type, O
chr10	18443879	18444041	0.0449	0.4125	0.3676	-26	Ranbp17	NM_001106994	RAN binding protein 17
chr2	181874167	181874271	0.0282	0.2473	0.2191	4	Rbm46	NM_001135717	RNA binding motif protein 46
chr2	196415466	196415531	0.5902	0.8588	0.2686	31	RGD1359334	NM_001007638	similar to hypothetical protein FLJ20519
chr8	13290712	13290746	0.0594	0.2143	0.1549	44	RGD1561795	NM_001109289	similar to RIKEN cDNA 1700012B09
chr11	11585968	11586026	0.0503	0.318	0.2677	-463	Robo2	NM_032106	roundabout guidance receptor 2
chr17	11953564	11953624	0.0091	0.1309	0.1218	42	Ror2	NM_001107339	receptor tyrosine kinase-like orphan receptor 2
chr10	82820475	82820519	0.0902	0.2889	0.1987	40	Samd14	NM_001024966	sterile alpha motif domain containing 14
chr10	65765985	65766115	0.011	0.1409	0.1299	0	Sarm1	NM_001105817	sterile alpha and TIR motif containing 1
chr15	42638590	42638779	0.0538	0.1619	0.1081	-276	Scara3	NM_001108870	scavenger receptor class A, member 3
chr2	85377312	85377490	0.028	0.1964	0.1684	83	Sema5a	NM_001107659	semaphorin 5A
chr12	50090318	50090464	0.0155	0.1361	0.1206	-88	Sez6l	NM_001134538	seizure related 6 homolog like
chr1	261446619	261446698	0.0241	0.2763	0.2522	-89	Sfrp5	NM_001107591	secreted frizzled-related protein 5
chr17	13670490	13670572	0.0103	0.1526	0.1423	11	Shc3	NM_001105743	SHC adaptor protein 3
chr14	42221198	42221232	0.0249	0.1658	0.1409	10	Shisa3	NM_001109087	shisa family member 3
chr1	72545448	72545498	0.0851	0.4952	0.4101	-123	Shisa7	NM_001145175	shisa family member 7
chr20	55594560	55594603	0.057	0.3201	0.2631	-94	Sim1	NM_001107641	single-minded family bHLH transcription factor 1
chr6	8956322	8956353	0.6196	0.9545	0.3349	-450	Six2	NM_001191908	SIX homeobox 2
chr3	161433266	161433323	0.0227	0.1596	0.1369	-8	Slc12a5	NM_134363	solute carrier family 12 member 5
chr3	155103105	155103384	0.005	0.1375	0.1325	95	Slc32a1	NM_031782	solute carrier family 32 member 1
chr14	60276758	60276886	0.0911	0.2854	0.1943	-306	Slc34a2	NM_053380	solute carrier family 34 member 2
chr7	29435355	29435541	0.0194	0.1626	0.1432	-384	Slc5a8	NM_001191987	solute carrier family 5 member 8
chr1	32364420	32364478	0.0802	0.1998	0.1196	-466	Slc6a3	NM_012694	solute carrier family 6 member 3
chr3	59981829	59981928	0.0311	0.1645	0.1334	-80	Sp9	NM_001191902	Sp9 transcription factor
chr5	49439066	49439093	0.7559	0.916	0.1601	100	Spaca1	NM_001191982	sperm acrosome associated 1
chr14	37108451	37108541	0.0372	0.2086	0.1714	-262	Spata18	NM_199374	spermatogenesis associated 18
chr10	91302173	91302239	0.1165	0.4096	0.2931	-51	Spata32	NM_001005531	spermatogenesis associated 32
chr9	82571281	82571316	0.108	0.5538	0.4458	-46	Speg	NM_001108802	SPEG complex locus
chr8	67232204	67232379	0.646	0.9344	0.2884	6	Spesp1	NM_001077682	sperm equatorial segment protein 1
chr1	212622443	212622651	0.0259	0.3489	0.323	-10	Sprn	NM_001031845	shadow of prion protein
chr3	142739704	142739819	0.0154	0.1691	0.1537	-19	Sstr4	NM_013036	somatostatin receptor 4
chr18	59748787	59748811	0	0.3043	0.3043	33	St8sia3	NM_013029	ST8 alpha-N-acetyl-neuraminide alpha-2,8-sialyltransferase 3
chr9	103207039	103207085	0.001	0.1117	0.1107	92	St8sia4	NM_053914	ST8 alpha-N-acetyl-neuraminide alpha-2,8-sialyltransferase 4
chr10	16542749	16542895	0.0212	0.126	0.1048	-87	Stc2	NM_022230	stanniocalcin 2
chr6	65319391	65319492	0.0069	0.1135	0.1066	85	Stxbp6	NM_001191872	syntaxin binding protein 6
chr1	198652648	198652684	0.0144	0.1339	0.1195	8	Tbc1d10b	NM_001108921	TBC1 domain family, member 10b
chr8	25904730	25904788	0.0272	0.1479	0.1207	-189	Tbx20	NM_001108132	T-box 20
chr1	52894713	52894875	0.0202	0.1834	0.1632	38	Tbxt	NM_001106209	T-box transcription factor T
chr1	210739555	210739625	0.0148	0.2111	0.1963	10	Tcerg1l	NM_001130077	transcription elongation regulator 1-like
chr9	19917522	19917578	0.0365	0.1675	0.131	-191	Tdrd6	NM_001191583	tudor domain containing 6
chr1	101214328	101214736	0.0541	0.2381	0.184	-61	Tead2	NM_001107512	TEA domain transcription factor 2
chr2	22385977	22386005	0.0101	0.151	0.1409	-136	Thbs4	NM_017133	thrombospondin 4
chr1	264893174	264893303	0.018	0.1648	0.1468	77	Tlx1	NM_001109166	T-cell leukemia, homeobox 1
chr12	31934194	31934231	0.0435	0.4258	0.3823	-130	Tmem132d	NM_198727	transmembrane protein 132D
chr6	137084710	137084801	0.0151	0.127	0.1119	-17	Tmem179	NM_001126280	transmembrane protein 179
chr5	145188117	145188378	0.0694	0.6692	0.5998	-75	Tmem35b	NM_001271137	transmembrane protein 35B
chr12	30107116	30107182	0.0255	0.1766	0.1511	-260	Tpst1	NM_001011903	tyrosylprotein sulfotransferase 1
chr2	228544480	228544516	0.0181	0.1594	0.1413	80	Tram1l1	NM_001107724	translocation associated membrane protein 1-like 1
chr8	119566409	119566557	0.0205	0.4771	0.4566	-26	Trank1	NM_001191799	tetratricopeptide repeat and ankyrin repeat containing 1
chr8	6811570	6811604	0.0185	0.2888	0.2703	44	Trpc6	NM_053559	transient receptor potential cation channel, subfamily C, member 6
chr4	160605026	160605081	0.0855	0.3104	0.2249	53	Tspan9	NM_001107890	tetraspanin 9
chr7	140617672	140617698	0.1377	0.3074	0.1697	36	Tuba1b	NM_001044270	tubulin, alpha 1B
chrX	18726751	18726966	0	0.1809	0.1809	-127	Ubqln2	NM_001108251	ubiquilin 2
chr16	67048000	67048299	0.0336	0.4561	0.4225	58	Unc5d	NM_001107319	unc-5 netrin receptor D
chr2	119197201	119197332	0.0054	0.1524	0.147	14	Usp13	NM_001107665	ubiquitin specific peptidase 13
chr20	33076991	33077104	0.0024	0.1255	0.1231	-58	Vgll2	NM_001107630	vestigial-like family member 2
chr16	9092310	9092420	0.0075	0.1383	0.1308	58	Vstm4	NM_001029920	V-set and transmembrane domain containing 4
chr7	79471299	79471331	0.0353	0.1417	0.1064	38	Zfpm2	NM_001130501	zinc finger protein, multitype 2
chr8	98738470	98738513	0.0704	0.1735	0.1031	-295	Zic1	NM_022677	Zic family member 1
chrX	140877977	140878036	0.0181	0.4447	0.4266	-458	Zic3	NM_001109019	Zic family member 3
chr2	78825096	78825135	0.0175	0.2083	0.1908	19	2021-03-11	NM_001101828	membrane associated ring-CH-type finger 11
chr10	106240855	106240948	0.0046	0.7106	0.706	-299	2021-09-09	NM_031837	septin 9
